# Supplementary material
Source: PubMed Central journal article supplement (PMC7855616)
Supplement: NIHMS1656468-supplement-Supplemental_Publication_Material.pdf [file NIHMS1656468-supplement-Supplemental_Publication_Material.pdf]

## **SUPPLEMENTAL MATERIAL**

**Supplemental Table I.** Primary and secondary outcomes, detailed data as shown in **Figure 3**.

|                                                                                                                                       | <b>Control<br/>N = 145</b> | <b>Treatment<br/>N = 145</b> | <b>p-<br/>value</b> | <b>Relative<br/>Risk</b> |
|---------------------------------------------------------------------------------------------------------------------------------------|----------------------------|------------------------------|---------------------|--------------------------|
| <b>Primary outcome</b>                                                                                                                |                            |                              |                     |                          |
| Initiation or Intensification of GDMT (EVBB, ACEI, ARB, ARNI, MRA, H/ISDN, or ivabradine) from pre-cardiology clinic visit to 30 days | 43 (29.7%)                 | 71 (49.0%)                   | 0.001               | 1.6 (1.2, 2.2)           |
| Intensification occurring during cardiology clinic visit (day 1)                                                                      | 42 (29.0%)                 | 61 (42.1%)                   | 0.03                | 1.4 (1.1, 2.0)           |
| Any intensification in HF <sub>r</sub> EF medication, including GDMT, loop diuretic, or digoxin                                       | 45 (31.0%)                 | 73 (50.3%)                   | 0.001               | 1.6 (1.2, 2.1)           |
| <b>Change categories</b>                                                                                                              |                            |                              |                     |                          |
| Key heart failure medication added                                                                                                    | 10 (6.9%)                  | 17 (11.7%)                   | 0.22                | 1.7 (0.8, 3.6)           |
| Beta blocker                                                                                                                          | 2 (1.4%)                   | 0 (0.0%)                     | 0.49                | -                        |
| ACE-I                                                                                                                                 | 1 (0.7%)                   | 4 (2.8%)                     | 0.37                | -                        |
| ARB                                                                                                                                   | 4 (2.8%)                   | 2 (1.4%)                     | 0.68                | -                        |
| ARNI                                                                                                                                  | 0 (0.0%)                   | 0 (0.0%)                     | -                   | -                        |
| Loop diuretic                                                                                                                         | 0 (0.0%)                   | 0 (0.0%)                     | -                   | -                        |
| Aldosterone antagonist                                                                                                                | 3 (2.1%)                   | 5 (3.4%)                     | 0.72                | -                        |
| Ivabradine                                                                                                                            | 0 (0.0%)                   | 1 (0.7%)                     | >0.99               | -                        |
| Hydralazine                                                                                                                           | 1 (0.7%)                   | 1 (0.7%)                     | >0.99               | -                        |
| Isosorbide                                                                                                                            | 1 (0.7%)                   | 2 (2.4%)                     | >0.99               | -                        |
| Digoxin                                                                                                                               | 0 (0.0%)                   | 0 (0.0%)                     | -                   | -                        |
| ACE-I or ARB replaced with sacubitril/valsartan                                                                                       | 3 (2.1%)                   | 4 (2.8%)                     | >0.99               | 1.3 (0.3, 5.9)           |
| Key heart failure medication up-titrated                                                                                              | 33 (22.8%)                 | 58 (40.0%)                   | 0.002               | 1.7 (1.2, 2.5)           |
| Beta blocker                                                                                                                          | 16 (11.0%)                 | 32 (22.1%)                   | 0.02                | -                        |
| ACE-I                                                                                                                                 | 4 (2.8%)                   | 7 (4.8%)                     | 0.54                | -                        |
| ARB                                                                                                                                   | 7 (4.8%)                   | 7 (4.8%)                     | >0.99               | -                        |
| ARNI                                                                                                                                  | 5 (3.4%)                   | 6 (4.1%)                     | >0.99               | -                        |
| Loop diuretic                                                                                                                         | 1 (0.7%)                   | 0 (0.0%)                     | >0.99               | -                        |
| Aldosterone antagonist                                                                                                                | 3 (2.1%)                   | 8 (5.5%)                     | 0.22                | -                        |
| Ivabradine                                                                                                                            | 0 (0.0%)                   | 0 (0.0%)                     | -                   | -                        |
| Hydralazine                                                                                                                           | 0 (0.0%)                   | 2 (1.4%)                     | 0.50                | -                        |
| Isosorbide                                                                                                                            | 0 (0.0%)                   | 1 (0.7%)                     | 0.32                | -                        |
| Digoxin                                                                                                                               | 0 (0.0%)                   | 0 (0.0%)                     | -                   | -                        |

ACE-I=angiotensin converting enzyme inhibitors; ARB= angiotensin receptor blockers; ARNI= angiotensin receptor neprilysin inhibitors; EVBB=evidence-based beta blocker; GDMT=guideline-directed medical therapy; H/ISDN=hydralazine/isosorbide dinitrate; HF<sub>r</sub>EF=heart failure with reduced ejection fraction; MRA=mineralocorticoid receptor agonists

P values using Fisher exact. Relative risk from log-binomial model with fixed site effect.

**Supplemental Table II: Increase in beta blocker dosing**

| <b>Type of BB dose increase</b>                             | <b>N</b> | <b>Median (IQR)<br/>pre-clinic dose</b> | <b>Median (IQR)<br/>one-month dose</b> | <b>Median (IQR)<br/>dose increase</b> |
|-------------------------------------------------------------|----------|-----------------------------------------|----------------------------------------|---------------------------------------|
| Carvedilol dose increase<br>(Target dose: 50)               | 26       | 18.75 (12.5, 25.0)                      | 37.5 (25.0, 50.0)                      | 18.75 (9.4, 25.0)                     |
| Metoprolol succinate dose<br>increase<br>(Target dose: 200) | 21       | 50 (25, 100)                            | 75 (50, 150)                           | 25 (25, 50)                           |
| Drug change with increase in<br>% target dose               | 1        | 12.5mg Carvedilol<br>(25% target)       | 10mg Bisoprolol<br>(100% target)       | -                                     |
